# Supplementary material for: A qualitative examination of (political) media diets across age cohorts in five countries
Source: publisher site journal article supplement (doi:10.1515/commun-2023-0014), 2024-02-06
Supplement: Supplementary file 1 [file Hopmann_Appendix.docx]

**Appendix A**

**Focus group overview**

Two focus groups were held in each of the following five countries: Germany, Poland, Romania, Spain, and the UK. In total, ten focus groups were conducted. Each group consisted of five to eight people (except one group in Germany with three participants). The criterion for selecting participants was age. In each country, we conducted one discussion with the youngest adults (18–25 years old) and one discussion with people over 55 years old. We aimed for a gender balance, but it was not a necessary aspect of the study design.

*Table A1: Focus group composition overview.*

| Focus group  ID code | Participant  ID code | Country | Gender | Age group |
| --- | --- | --- | --- | --- |
| FG01 | DEC01 | Germany | Male | 18–25 |
| DEC02 | Germany | Male | 18–25 |
| DEC03 | Germany | Female | 18–25 |
| DEC04 | Germany | Male | 18–25 |
| DEC05 | Germany | Female | 18–25 |
| DEC06 | Germany | Male | 18–25 |
| FG02 | DEC07 | Germany | Female | 55+ |
| DEC08 | Germany | Female | 55+ |
| DEC09 | Germany | Male | 55+ |
| FG03 | PLC01 | Poland | Male | 55+ |
| PLC02 | Poland | Female | 55+ |
| PLC03 | Poland | Male | 55+ |
| PLC04 | Poland | Female | 55+ |
| PLC05 | Poland | Male | 55+ |
| PLC06 | Poland | Female | 55+ |
| PLC07 | Poland | Male | 55+ |
| FG04 | PLC08 | Poland | Male | 18–25 |
| PLC09 | Poland | Female | 18–25 |
| PLC10 | Poland | Female | 18–25 |
| PLC11 | Poland | Female | 18–25 |
| PLC12 | Poland | Female | 18–25 |
| PLC13 | Poland | Male | 18–25 |
| FG05 | ROC01 | Romania | Female | 18–25 |
| ROC02 | Romania | Female | 18–25 |
| ROC03 | Romania | Female | 18–25 |
| ROC04 | Romania | Male | 18–25 |
| ROC05 | Romania | Male | 18–25 |
| ROC06 | Romania | Female | 18–25 |
| ROC07 | Romania | Female | 18–25 |
| FG06 | ROC08 | Romania | Male | 55+ |
| ROC09 | Romania | Female | 55+ |
| ROC10 | Romania | Female | 55+ |
| ROC11 | Romania | Female | 55+ |
| ROC12 | Romania | Female | 55+ |
| ROC13 | Romania | Male | 55+ |
| FG07 | ESC01 | Spain | Male | 55+ |
| ESC02 | Spain | Female | 55+ |
| ESC03 | Spain | Female | 55+ |
| ESC04 | Spain | Female | 55+ |
| ESC05 | Spain | Female | 55+ |
| FG08 | ESC06 | Spain | Male | 18–25 |
| ESC07 | Spain | Male | 18–25 |
| ESC08 | Spain | Male | 18–25 |
| ESC09 | Spain | Female | 18–25 |
| ESC10 | Spain | Female | 18–25 |
| ESC11 | Spain | Female | 18–25 |
| FG09 | UKC01 | UK | Male | 18–25 |
| UKC02 | UK | Female | 18–25 |
| UKC03 | UK | Male | 18–25 |
| UKC04 | UK | Female | 18–25 |
| UKC05 | UK | Male | 18–25 |
| UKC06 | UK | Male | 18–25 |
| FG10 | UKC10 | UK | Female | 55+ |
| UKC11 | UK | Male | 55+ |
| UKC12 | UK | Male | 55+ |
| UKC13 | UK | Female | 55+ |
| UKC14 | UK | Male | 55+ |
| UKC15 | UK | Male | 55+ |

All focus group discussions were conducted online, with the use of platforms such as Zoom, MS Teams, Webex, or Jitsi. The focus group discussions lasted around 90 minutes. Each focus group in a respective country was moderated by the same moderator based on the standardized question guide.

Each participant received an official invitation and a file with information about the project. Before the focus group discussions and interviews started, respondents delivered their consent forms either in a print, signed, and scanned format or in an oral form.

Discussions and interviews were recorded, and full transcripts were prepared based on the recordings. While preparing transcripts, all personal data were deleted from the document; the transcripts, therefore, are fully anonymized.
